# Supplementary material for: Indoxyl Sulfate Stimulates Angiogenesis by Regulating Reactive Oxygen Species Production via CYP1B1
Source: MDPI journal article supplement (doi:10.3390/toxins11080454), 2019-08-02
Supplement: s1 [file s1]

## GSEA Report for Dataset Differentially\_expressed\_genes\_RNAseq

### Enrichment in phenotype: up (1 samples)

- 1 / 1 gene sets are upregulated in phenotype **up**
- 1 gene sets are significant at FDR < 25%
- 0 gene sets are significantly enriched at nominal pvalue < 1%
- 0 gene sets are significantly enriched at nominal pvalue < 5%
- [Snapshot](#) of enrichment results
- Detailed [enrichment results in html](#) format
- Detailed [enrichment results in excel](#) format (tab delimited text)
- [Guide to](#) interpret results

### Enrichment in phenotype: down (1 samples)

- None of the gene sets are enriched in phenotype **down**
- [Guide to](#) interpret results

### Dataset details

- The dataset has 1293 features (genes)
- No probe set => gene symbol collapsing was requested, so all 1293 features were used

### Gene set details

- Gene set size filters (min=15, max=500) resulted in filtering out 0 / 1 gene sets
- The remaining 1 gene sets were used in the analysis
- List of [gene sets used and their sizes](#) (restricted to features in the specified dataset)

### Gene markers for the up versus down comparison

- The dataset has 1293 features (genes)
- # of markers for phenotype **up**: 643 (49.7% ) with correlation area 49.4%
- # of markers for phenotype **down**: 650 (50.3% ) with correlation area 50.6%

- Detailed [rank ordered gene list](#) for all features in the dataset
- [Heat map and gene list correlation](#) profile for all features in the dataset

## Global statistics and plots

- Plot of [p-values vs. NES](#)
- [Global ES](#) histogram

## Other

- [Parameters](#) used for this analysis

## Comments

- Timestamp used as random seed: 1562578785087

---

|                                             |                                                              |                                                                                                                                       |
|---------------------------------------------|--------------------------------------------------------------|---------------------------------------------------------------------------------------------------------------------------------------|
| xtools.gsea.Gsea [Mon, Jul 8, '19 11 AM 39] | Report: AhR_enrichment.Gsea.1562578785071.rpt by user: Jiayi | Website: <a href="http://www.gsea-msigdb.org/gsea">www.gsea-msigdb.org/gsea</a> Questions & Suggestions: <a href="#">Contact page</a> |
|---------------------------------------------|--------------------------------------------------------------|---------------------------------------------------------------------------------------------------------------------------------------|
