# Supplementary material for: Indoxyl Sulfate Stimulates Angiogenesis by Regulating Reactive Oxygen Species Production via CYP1B1
Source: Toxins (Basel). 2019 Aug 2;11(8):454. doi: 10.3390/toxins11080454 (PMC6723868; doi:10.3390/toxins11080454)
Supplement: Supplementary file 1 [file toxins-11-00454-s001.zip]

Archive with 4 entries (4 files):
- Supplementary Figure 1.pdf
- Supplementary Figure 2.pdf
- Supplementary Report 1.pdf
- Supplementary Table 1.xlsx
