# Supplementary material for: Indoxyl Sulfate Stimulates Angiogenesis by Regulating Reactive Oxygen Species Production via CYP1B1
Source: Toxins (Basel). 2019 Aug 2;11(8):454. doi: 10.3390/toxins11080454 (PMC6723868; doi:10.3390/toxins11080454)
Supplement: Supplementary file 1 [file toxins-11-00454-s001.zip › Supplementary Table 1.xlsx]

## Sheet: Supplemental Table 1a.
Supplemental Table 1a. Increased gene expressions under indoxyl sulfate stimulation when compared to control.
Ensembl ID	Gene name	Log2 FoldChange	P-value
ENSG00000138061	CYP1B1	1.43457	1.39043e-38
ENSG00000114812	VIPR1	1.321	1.07238e-36
ENSG00000137809	ITGA11	1.27223	4.19047e-32
ENSG00000178695	KCTD12	0.882627	3.24717e-17
ENSG00000063438	AHRR	0.872081	4.14366e-15
ENSG00000007908	SELE	0.745985	1.23957e-13
ENSG00000137331	IER3	0.735872	5.39598e-19
ENSG00000163659	TIPARP	0.733986	8.86534e-20
ENSG00000144476	ACKR3	0.69479	1.59597e-13
ENSG00000144802	NFKBIZ	0.662527	3.02214e-10
ENSG00000179151	EDC3	0.602992	2.69481e-14
ENSG00000170323	FABP4	0.599544	1.30125e-13
ENSG00000108691	CCL2	0.590173	3.0422e-16
ENSG00000165092	ALDH1A1	0.538721	4.07264e-15
ENSG00000116678	LEPR	0.533609	2.32593e-12
ENSG00000074527	NTN4	0.52552	3.20568e-14
ENSG00000184292	TACSTD2	0.524625	6.32182e-12
ENSG00000162337	LRP5	0.51682	4.48374e-11
ENSG00000115594	IL1R1	0.50535	1.12919e-06
ENSG00000073756	PTGS2	0.488014	8.86143e-09
ENSG00000185022	MAFF	0.48588	3.34576e-10
ENSG00000105639	JAK3	0.470702	1.11733e-05
ENSG00000157601	MX1	0.459332	3.25732e-05
ENSG00000166825	ANPEP	0.458078	1.65858e-15
ENSG00000172602	RND1	0.4493	2.72232e-05
ENSG00000205502	C2CD4B	0.448894	2.28602e-05
ENSG00000135914	HTR2B	0.448393	3.17892e-05
ENSG00000138759	FRAS1	0.43286	2.55578e-05
ENSG00000171223	JUNB	0.426243	1.94695e-06
ENSG00000116711	PLA2G4A	0.423712	2.40842e-05
ENSG00000008517	IL32	0.413228	5.65822e-06
ENSG00000165949	IFI27	0.411513	1.10879e-05
ENSG00000106688	SLC1A1	0.402923	0.000259434
ENSG00000117525	F3	0.402836	0.00016784
ENSG00000235505	RP11-693N9.2	0.4022	0.000144832
ENSG00000163171	CDC42EP3	0.39828	9.06855e-07
ENSG00000130589	HELZ2	0.397109	2.416e-06
ENSG00000109501	WFS1	0.396377	1.55182e-09
ENSG00000164951	PDP1	0.394384	4.36201e-08
ENSG00000164687	FABP5	0.390455	0.000243347
ENSG00000134138	MEIS2	0.389476	4.99099e-05
ENSG00000141753	IGFBP4	0.380224	3.19356e-10
ENSG00000204634	TBC1D8	0.373804	2.39167e-06
ENSG00000111335	OAS2	0.370613	0.00040284
ENSG00000143387	CTSK	0.370367	0.00082884
ENSG00000084112	SSH1	0.368927	3.75517e-08
ENSG00000142459	EVI5L	0.367493	0.000288132
ENSG00000128284	APOL3	0.363171	2.1859e-05
ENSG00000108797	CNTNAP1	0.362372	1.49749e-05
ENSG00000162496	DHRS3	0.357048	0.000309443
ENSG00000184113	CLDN5	0.355037	1.18889e-06
ENSG00000196611	MMP1	0.354634	0.00136294
ENSG00000090339	ICAM1	0.352645	2.17762e-06
ENSG00000104081	BMF	0.351875	0.000428043
ENSG00000198722	UNC13B	0.351192	1.81821e-09
ENSG00000188549	C15orf52	0.348343	0.000264367
ENSG00000184497	TMEM255B	0.348237	0.000441594
ENSG00000129538	RNASE1	0.346002	2.30609e-06
ENSG00000177570	SAMD12	0.343584	0.00149982
ENSG00000181284	TMEM102	0.342234	0.00176744
ENSG00000142102	ATHL1	0.340699	0.000300623
ENSG00000266714	MYO15B	0.338862	0.00189532
ENSG00000170542	SERPINB9	0.336036	1.06218e-05
ENSG00000136378	ADAMTS7	0.335958	7.89089e-07
ENSG00000168542	COL3A1	0.33475	0.00258052
ENSG00000169429	CXCL8	0.333772	0.00213976
ENSG00000138435	CHRNA1	0.332264	0.000243894
ENSG00000104324	CPQ	0.331298	0.00168861
ENSG00000184545	DUSP8	0.331231	0.00267605
ENSG00000175048	ZDHHC14	0.330959	0.000263106
ENSG00000126709	IFI6	0.33039	0.00289748
ENSG00000077238	IL4R	0.329855	1.87017e-06
ENSG00000112096	SOD2	0.329329	7.8601e-06
ENSG00000101460	MAP1LC3A	0.327859	0.00226725
ENSG00000141179	PCTP	0.326507	0.00203527
ENSG00000139567	ACVRL1	0.323857	2.04185e-09
ENSG00000104951	IL4I1	0.323477	0.00171639
ENSG00000125347	IRF1	0.320626	0.00169404
ENSG00000058404	CAMK2B	0.319845	0.00375154
ENSG00000180730	SHISA2	0.31502	0.000430934
ENSG00000074590	NUAK1	0.314695	7.2449e-06
ENSG00000103653	CSK	0.313017	7.91886e-06
ENSG00000171159	C9orf16	0.310211	0.0038304
ENSG00000150630	VEGFC	0.309616	0.00128091
ENSG00000119917	IFIT3	0.307316	0.00559431
ENSG00000139289	PHLDA1	0.307186	1.9713e-06
ENSG00000123933	MXD4	0.306565	5.88589e-06
ENSG00000069399	BCL3	0.305614	0.00342103
ENSG00000028277	POU2F2	0.304714	0.00164891
ENSG00000105499	PLA2G4C	0.30441	9.98289e-05
ENSG00000184916	JAG2	0.304347	2.3287e-05
ENSG00000105270	CLIP3	0.30335	0.000629413
ENSG00000126950	TMEM35	0.302392	0.00628446
ENSG00000185189	NRBP2	0.301467	0.000968832
ENSG00000056972	TRAF3IP2	0.298611	0.00466086
ENSG00000127533	F2RL3	0.298312	0.00640832
ENSG00000013016	EHD3	0.297531	1.14145e-05
ENSG00000128052	KDR	0.297425	1.7929e-08
ENSG00000261468	RP11-1024P17.1	0.296919	0.006449
ENSG00000079102	RUNX1T1	0.29664	0.00302249
ENSG00000172572	PDE3A	0.296167	0.000898706
ENSG00000105204	DYRK1B	0.294263	0.00108269
ENSG00000166780	C16orf45	0.2928	0.00566014
ENSG00000120217	CD274	0.290388	0.00691361
ENSG00000178814	OPLAH	0.289576	0.00895065
ENSG00000185112	FAM43A	0.289326	2.81384e-06
ENSG00000103241	FOXF1	0.289114	0.00329736
ENSG00000102359	SRPX2	0.28902	0.000500981
ENSG00000163513	TGFBR2	0.288789	4.11761e-08
ENSG00000213563	C8orf82	0.286893	0.00783434
ENSG00000171345	KRT19	0.286567	0.0077478
ENSG00000152284	TCF7L1	0.284175	0.00187646
ENSG00000151748	SAV1	0.283919	0.000468377
ENSG00000231925	TAPBP	0.282987	4.6211e-07
ENSG00000178718	RPP25	0.282515	0.00283499
ENSG00000160326	SLC2A6	0.282496	6.18054e-05
ENSG00000155465	SLC7A7	0.282197	0.00153487
ENSG00000137496	IL18BP	0.282014	0.0111274
ENSG00000179820	MYADM	0.281846	7.09234e-06
ENSG00000109743	BST1	0.280986	0.0112651
ENSG00000178922	HYI	0.278111	0.000546863
ENSG00000134575	ACP2	0.277818	0.00228418
ENSG00000183401	CCDC159	0.277728	0.0120151
ENSG00000108639	SYNGR2	0.276203	0.000347601
ENSG00000088899	LZTS3	0.275164	0.0121346
ENSG00000141655	TNFRSF11A	0.274586	0.0111561
ENSG00000221968	FADS3	0.274258	2.90387e-05
ENSG00000104856	RELB	0.274094	0.00339175
ENSG00000169169	CPT1C	0.273866	0.00285861
ENSG00000105737	GRIK5	0.27262	0.0104522
ENSG00000116717	GADD45A	0.272602	0.00385733
ENSG00000165507	C10orf10	0.272487	1.24067e-08
ENSG00000078269	SYNJ2	0.272127	3.75709e-05
ENSG00000167100	SAMD14	0.272116	0.0101751
ENSG00000104361	NIPAL2	0.271782	0.00767074
ENSG00000197301	RP11-366L20.2	0.271675	0.0103114
ENSG00000256043	CTSO	0.271148	0.00753807
ENSG00000078401	EDN1	0.271146	8.70052e-07
ENSG00000022556	NLRP2	0.270928	0.0125626
ENSG00000197774	EME2	0.27087	0.0140626
ENSG00000101335	MYL9	0.270758	0.00299638
ENSG00000158270	COLEC12	0.270548	0.000763801
ENSG00000188191	PRKAR1B	0.269601	0.00811759
ENSG00000110900	TSPAN11	0.269082	0.0144608
ENSG00000164849	GPR146	0.268999	0.00668716
ENSG00000023445	BIRC3	0.268173	0.0157534
ENSG00000121858	TNFSF10	0.266939	0.00233052
ENSG00000067445	TRO	0.266526	0.0160198
ENSG00000132530	XAF1	0.26641	0.0148452
ENSG00000171056	SOX7	0.263504	0.000217212
ENSG00000196169	KIF19	0.262943	0.0173618
ENSG00000155463	OXA1L	0.261643	4.80809e-05
ENSG00000154556	SORBS2	0.261521	0.00322802
ENSG00000099282	TSPAN15	0.260319	0.00997529
ENSG00000169242	EFNA1	0.260252	0.00175119
ENSG00000125841	NRSN2	0.260171	0.00209248
ENSG00000158792	SPATA2L	0.259458	0.0194555
ENSG00000173598	NUDT4	0.259437	0.000895744
ENSG00000126005	MMP24-AS1	0.259315	0.00615866
ENSG00000126603	GLIS2	0.258986	0.0031412
ENSG00000181513	ACBD4	0.258374	0.0173855
ENSG00000130066	SAT1	0.258245	0.00127246
ENSG00000121966	CXCR4	0.256175	0.000484143
ENSG00000164116	GUCY1A3	0.256109	0.0100592
ENSG00000164867	NOS3	0.255826	0.000341236
ENSG00000169136	ATF5	0.255404	0.00114599
ENSG00000100060	MFNG	0.25479	0.000390089
ENSG00000100918	REC8	0.253903	0.0215366
ENSG00000167861	HID1	0.253512	0.000759259
ENSG00000146072	TNFRSF21	0.253377	0.00102192
ENSG00000221869	CEBPD	0.252589	0.0135356
ENSG00000106479	ZNF862	0.252022	0.0183143
ENSG00000107281	NPDC1	0.251846	8.04826e-05
ENSG00000187608	ISG15	0.250376	0.0229916
ENSG00000100342	APOL1	0.249969	0.00302203
ENSG00000175602	CCDC85B	0.249788	0.00101587
ENSG00000188997	KCTD21	0.249239	0.0192404
ENSG00000134769	DTNA	0.248106	0.0229172
ENSG00000136490	LIMD2	0.247412	0.00525718
ENSG00000158106	RHPN1	0.245983	0.0213866
ENSG00000101986	ABCD1	0.245446	0.0151006
ENSG00000183018	SPNS2	0.24537	0.00440943
ENSG00000006638	TBXA2R	0.245017	0.0274231
ENSG00000243449	C4orf48	0.244812	0.0210732
ENSG00000204525	HLA-C	0.244448	2.40062e-05
ENSG00000197070	ARRDC1	0.244385	0.0190654
ENSG00000171522	PTGER4	0.243992	0.0151228
ENSG00000186994	KANK3	0.243964	0.015414
ENSG00000109079	TNFAIP1	0.243451	2.56324e-05
ENSG00000179981	TSHZ1	0.2432	0.0174444
ENSG00000107731	UNC5B	0.242787	0.0264537
ENSG00000111912	NCOA7	0.24238	0.00134535
ENSG00000215788	TNFRSF25	0.24193	0.0187521
ENSG00000133805	AMPD3	0.241229	0.0264782
ENSG00000142871	CYR61	0.240735	1.99405e-06
ENSG00000233276	GPX1	0.240678	0.00238723
ENSG00000261425	RP11-709B3.2	0.240479	0.000510447
ENSG00000161921	CXCL16	0.240211	0.0197066
ENSG00000105559	PLEKHA4	0.240086	0.0294372
ENSG00000182796	TMEM198B	0.240046	0.0263311
ENSG00000187609	EXD3	0.239471	0.024897
ENSG00000064692	SNCAIP	0.239247	0.00724063
ENSG00000197948	FCHSD1	0.237792	0.0160033
ENSG00000158286	RNF207	0.237346	0.0171345
ENSG00000130307	USHBP1	0.237289	0.0307248
ENSG00000100299	ARSA	0.237152	0.0251746
ENSG00000075618	FSCN1	0.236515	3.326e-05
ENSG00000197119	SLC25A29	0.236249	0.00779617
ENSG00000196588	MKL1	0.236156	0.00791495
ENSG00000118640	VAMP8	0.235948	0.0313817
ENSG00000133466	C1QTNF6	0.235941	0.00750053
ENSG00000214063	TSPAN4	0.235935	0.0041767
ENSG00000171992	SYNPO	0.235513	1.34473e-05
ENSG00000137801	THBS1	0.234971	1.17064e-06
ENSG00000110697	PITPNM1	0.234927	0.021662
ENSG00000163013	FBXO41	0.234751	0.0203626
ENSG00000181804	SLC9A9	0.234455	0.0300597
ENSG00000225138	CTD-2228K2.7	0.23426	0.0323306
ENSG00000102010	BMX	0.233828	0.00049711
ENSG00000218891	ZNF579	0.233797	0.0312527
ENSG00000110492	MDK	0.233571	0.00230693
ENSG00000164877	MICALL2	0.23357	0.0214225
ENSG00000099785	MARCH2	0.23353	0.0153509
ENSG00000180917	CMTR2	0.233095	0.0262129
ENSG00000077150	NFKB2	0.23284	0.00212362
ENSG00000261971	MMP25-AS1	0.232831	0.0337156
ENSG00000102871	TRADD	0.232452	0.0332044
ENSG00000177666	PNPLA2	0.232096	0.000962378
ENSG00000196998	WDR45	0.232031	0.0237555
ENSG00000183828	NUDT14	0.23198	0.0128914
ENSG00000127554	GFER	0.231962	0.0317682
ENSG00000205213	LGR4	0.230834	0.0366864
ENSG00000081041	CXCL2	0.23071	0.0192004
ENSG00000171724	VAT1L	0.230621	0.0241798
ENSG00000226137	BAIAP2-AS1	0.23046	0.0147483
ENSG00000170271	FAXDC2	0.230259	0.0381495
ENSG00000131016	AKAP12	0.229953	4.40597e-06
ENSG00000165804	ZNF219	0.229675	0.0240475
ENSG00000181523	SGSH	0.229665	0.00278681
ENSG00000137752	CASP1	0.22884	0.0364025
ENSG00000130940	CASZ1	0.228713	0.037053
ENSG00000235863	B3GALT4	0.22864	0.0336275
ENSG00000103168	TAF1C	0.228555	0.00561461
ENSG00000169129	AFAP1L2	0.228473	0.0108723
ENSG00000158560	DYNC1I1	0.227947	0.0377351
ENSG00000167617	CDC42EP5	0.227821	0.0243425
ENSG00000178719	GRINA	0.227754	0.00110295
ENSG00000180611	MB21D2	0.22774	0.0382172
ENSG00000119574	ZBTB45	0.227523	0.0266342
ENSG00000002549	LAP3	0.227154	0.000452493
ENSG00000140181	HERC2P2	0.227127	0.0178312
ENSG00000160013	PTGIR	0.227078	0.0395383
ENSG00000115457	IGFBP2	0.226653	0.00109079
ENSG00000106351	AGFG2	0.226596	0.0141119
ENSG00000137198	GMPR	0.226326	0.0193105
ENSG00000171246	NPTX1	0.226211	0.00120241
ENSG00000148926	ADM	0.225797	0.0241742
ENSG00000168679	SLC16A4	0.225756	0.0415269
ENSG00000125744	RTN2	0.225675	0.0413665
ENSG00000129667	RHBDF2	0.225591	0.00396511
ENSG00000119714	GPR68	0.225558	0.00485194
ENSG00000135931	ARMC9	0.225322	0.0262838
ENSG00000106366	SERPINE1	0.225315	3.74635e-05
ENSG00000150967	ABCB9	0.225072	0.0336714
ENSG00000004059	ARF5	0.224397	0.00654425
ENSG00000157379	DHRS1	0.22433	0.0360536
ENSG00000004139	SARM1	0.224182	0.0204638
ENSG00000099889	ARVCF	0.223963	0.00398818
ENSG00000046889	PREX2	0.223677	0.00192076
ENSG00000161671	EMC10	0.223555	0.00196882
ENSG00000129474	AJUBA	0.223391	0.00257298
ENSG00000224051	CPTP	0.22318	0.0183782
ENSG00000130522	JUND	0.222636	0.00897471
ENSG00000154930	ACSS1	0.222419	0.013088
ENSG00000160685	ZBTB7B	0.221385	0.0266666
ENSG00000134590	FAM127A	0.221249	0.00489047
ENSG00000178498	DTX3	0.221162	0.035254
ENSG00000006042	TMEM98	0.220254	0.0050133
ENSG00000176293	ZNF135	0.220031	0.027803
ENSG00000246922	UBAP1L	0.21996	0.0369856
ENSG00000136158	SPRY2	0.219959	0.027918
ENSG00000129946	SHC2	0.219941	0.0474409
ENSG00000234745	HLA-B	0.219076	0.000613636
ENSG00000128917	DLL4	0.218981	0.0154988
ENSG00000117298	ECE1	0.218926	1.46605e-05
ENSG00000167642	SPINT2	0.218897	0.0446237
ENSG00000146374	RSPO3	0.21889	0.0479526
ENSG00000162591	MEGF6	0.21875	0.00515614
ENSG00000105755	ETHE1	0.218665	0.0310548
ENSG00000176108	CHMP6	0.218445	0.0238028
ENSG00000135596	MICAL1	0.217838	0.0140388
ENSG00000130529	TRPM4	0.217829	0.0301259
ENSG00000148288	GBGT1	0.217647	0.0381369
ENSG00000125378	BMP4	0.217173	0.00417709
ENSG00000166821	PEX11A	0.216875	0.0403578
ENSG00000174080	CTSF	0.216843	0.0283897
ENSG00000175938	ORAI3	0.216693	0.0437307
ENSG00000215440	NPEPL1	0.216677	0.0499268
ENSG00000064932	SBNO2	0.216347	0.00192159
ENSG00000115275	MOGS	0.216183	0.0043741
ENSG00000153815	CMIP	0.216183	0.00124409
ENSG00000158828	PINK1	0.215644	0.0112507
ENSG00000158796	DEDD	0.215501	0.0129172
ENSG00000105514	RAB3D	0.215205	0.006274
ENSG00000178685	PARP10	0.21448	0.0279398
ENSG00000105701	FKBP8	0.214407	0.00177063
ENSG00000140873	ADAMTS18	0.213808	0.0260804
ENSG00000165152	TMEM246	0.213628	0.0497875
ENSG00000113761	ZNF346	0.213208	0.0352947
ENSG00000058799	YIPF1	0.213018	0.0475552
ENSG00000132622	HSPA12B	0.212923	0.0301032
ENSG00000150551	LYPD1	0.212876	0.0410953
ENSG00000140691	ARMC5	0.212073	0.0265912
ENSG00000173801	JUP	0.211786	0.00011527
ENSG00000148677	ANKRD1	0.211385	0.000102327
ENSG00000163739	CXCL1	0.210976	0.0495896
ENSG00000182636	NDN	0.210933	0.0288841
ENSG00000225663	FAM195B	0.210893	0.0493994
ENSG00000100379	KCTD17	0.210509	0.0315987
ENSG00000021762	OSBPL5	0.210433	0.0236804
ENSG00000182218	HHIPL1	0.210003	0.038743
ENSG00000130479	MAP1S	0.209803	0.0048283
ENSG00000177225	PDDC1	0.209527	0.00895598
ENSG00000070610	GBA2	0.209464	0.0162387
ENSG00000065308	TRAM2	0.208217	0.000102969
ENSG00000169696	ASPSCR1	0.207307	0.0449813
ENSG00000143390	RFX5	0.206965	0.0161836
ENSG00000188215	DCUN1D3	0.206952	0.0103409
ENSG00000104946	TBC1D17	0.205803	0.015229
ENSG00000114779	ABHD14B	0.205441	0.0430879
ENSG00000138080	EMILIN1	0.205106	0.0184671
ENSG00000124762	CDKN1A	0.204908	0.00240243
ENSG00000198917	C9orf114	0.204861	0.0354243
ENSG00000100612	DHRS7	0.204683	0.0328237
ENSG00000013364	MVP	0.204539	0.00103995
ENSG00000189343	RPS2P46	0.204343	0.0117593
ENSG00000175573	C11orf68	0.204167	0.0354768
ENSG00000171680	PLEKHG5	0.204003	0.00959648
ENSG00000166925	TSC22D4	0.203927	0.00457999
ENSG00000246705	H2AFJ	0.203667	0.0456697
ENSG00000135124	P2RX4	0.20336	0.010028
ENSG00000090432	MUL1	0.203044	0.0296332
ENSG00000143816	WNT9A	0.202794	0.04946
ENSG00000169189	NSMCE1	0.20278	0.0480777
ENSG00000167657	DAPK3	0.202727	0.00502822
ENSG00000178927	C17orf62	0.202376	0.0209269
ENSG00000172889	EGFL7	0.202325	0.00275914
ENSG00000158805	ZNF276	0.202264	0.030994
ENSG00000186827	TNFRSF4	0.201482	0.0316283
ENSG00000125534	PPDPF	0.20145	0.0235887
ENSG00000157873	TNFRSF14	0.20144	0.0312641
ENSG00000157191	NECAP2	0.200732	0.00456477
ENSG00000139990	DCAF5	0.200572	0.0102277
ENSG00000140474	ULK3	0.200489	0.0292454
ENSG00000205403	CFI	0.200087	0.0285237
ENSG00000137393	RNF144B	0.199664	0.0132103
ENSG00000179526	SHARPIN	0.19921	0.0350455
ENSG00000137507	LRRC32	0.198897	0.00278453
ENSG00000160796	NBEAL2	0.198669	0.00116644
ENSG00000133627	ACTR3B	0.198569	0.0499915
ENSG00000139880	CDH24	0.198504	0.0348649
ENSG00000105520	LPPR2	0.198369	0.0285345
ENSG00000154133	ROBO4	0.197991	3.42341e-05
ENSG00000139178	C1RL	0.197911	0.039887
ENSG00000144560	VGLL4	0.197774	0.00308873
ENSG00000084207	GSTP1	0.197772	0.00245962
ENSG00000010322	NISCH	0.197597	0.00641811
ENSG00000105223	PLD3	0.197452	0.00685869
ENSG00000178878	APOLD1	0.196346	0.047849
ENSG00000100023	PPIL2	0.196218	0.0186282
ENSG00000010295	IFFO1	0.195161	0.0414626
ENSG00000161955	TNFSF13	0.194774	0.0398708
ENSG00000205356	TECPR1	0.194378	0.00346621
ENSG00000100403	ZC3H7B	0.194356	0.00130013
ENSG00000164897	TMUB1	0.194334	0.0494919
ENSG00000178951	ZBTB7A	0.192712	0.0240387
ENSG00000136111	TBC1D4	0.192318	0.000795638
ENSG00000197536	C5orf56	0.192317	0.0324475
ENSG00000129968	ABHD17A	0.192271	0.0159913
ENSG00000167123	CERCAM	0.192271	0.030212
ENSG00000149809	TM7SF2	0.19214	0.0323091
ENSG00000204304	PBX2	0.191849	0.0188994
ENSG00000182179	UBA7	0.191814	0.0173983
ENSG00000127990	SGCE	0.19177	0.0479625
ENSG00000068650	ATP11A	0.191646	0.00167538
ENSG00000164736	SOX17	0.191484	0.0193692
ENSG00000012822	CALCOCO1	0.191335	0.0196157
ENSG00000149781	FERMT3	0.19065	0.0079869
ENSG00000119242	CCDC92	0.190416	0.0298809
ENSG00000131408	NR1H2	0.190241	0.0230292
ENSG00000100097	LGALS1	0.190137	0.0069919
ENSG00000126247	CAPNS1	0.19012	0.00195781
ENSG00000101421	CHMP4B	0.189867	0.00848955
ENSG00000130787	HIP1R	0.189831	0.00239098
ENSG00000105404	RABAC1	0.189628	0.0371999
ENSG00000185201	IFITM2	0.189379	0.0154961
ENSG00000185291	IL3RA	0.189057	0.0190105
ENSG00000186111	PIP5K1C	0.189005	0.00198136
ENSG00000109046	WSB1	0.188566	0.0043836
ENSG00000185215	TNFAIP2	0.188459	0.0434464
ENSG00000166311	SMPD1	0.188436	0.0169715
ENSG00000104419	NDRG1	0.188347	0.00715967
ENSG00000227507	LTB	0.188285	0.0421994
ENSG00000228474	OST4	0.18826	0.0365422
ENSG00000185800	DMWD	0.188176	0.0434918
ENSG00000130158	DOCK6	0.187551	0.000289843
ENSG00000159840	ZYX	0.18749	0.00215681
ENSG00000102606	ARHGEF7	0.187103	0.00222275
ENSG00000103415	HMOX2	0.187075	0.0350369
ENSG00000196700	ZNF512B	0.186949	0.0192962
ENSG00000183020	AP2A2	0.186901	0.003099
ENSG00000110799	VWF	0.186505	0.000567924
ENSG00000197324	LRP10	0.186377	0.000557792
ENSG00000142552	RCN3	0.186369	0.0461697
ENSG00000164054	SHISA5	0.186179	0.0134645
ENSG00000146909	NOM1	0.185745	0.0179168
ENSG00000135686	KLHL36	0.185629	0.0212664
ENSG00000168961	LGALS9	0.185379	0.0400088
ENSG00000087074	PPP1R15A	0.185151	0.00706876
ENSG00000111961	SASH1	0.184648	0.00377051
ENSG00000100439	ABHD4	0.184326	0.015319
ENSG00000233621	LINC01137	0.183933	0.0312943
ENSG00000170365	SMAD1	0.18391	0.00697725
ENSG00000059122	FLYWCH1	0.18387	0.0349301
ENSG00000126088	UROD	0.183545	0.0106041
ENSG00000047346	FAM214A	0.183545	0.0228623
ENSG00000168309	FAM107A	0.183491	0.0446048
ENSG00000178033	FAM26E	0.183357	0.0325642
ENSG00000158113	LRRC43	0.183201	0.02675
ENSG00000089280	FUS	0.182734	0.00476701
ENSG00000182197	EXT1	0.182562	0.0113222
ENSG00000108784	NAGLU	0.182511	0.0430958
ENSG00000103502	CDIPT	0.181507	0.0261991
ENSG00000198720	ANKRD13B	0.181239	0.04321
ENSG00000115129	TP53I3	0.180823	0.0261034
ENSG00000047644	WWC3	0.180767	0.00315678
ENSG00000112679	DUSP22	0.180319	0.0475755
ENSG00000118564	FBXL5	0.180302	0.0288798
ENSG00000140465	CYP1A1	0.180231	0.000864953
ENSG00000140983	RHOT2	0.17968	0.0356801
ENSG00000172638	EFEMP2	0.178822	0.0320355
ENSG00000189241	TSPYL1	0.178692	0.0119629
ENSG00000105429	MEGF8	0.178664	0.0038262
ENSG00000119801	YPEL5	0.178514	0.0332977
ENSG00000143434	SEMA6C	0.178469	0.0302721
ENSG00000189060	H1F0	0.17842	0.0251763
ENSG00000126432	PRDX5	0.178201	0.0349977
ENSG00000185236	RAB11B	0.178081	0.0331867
ENSG00000114353	GNAI2	0.177782	0.00279679
ENSG00000152465	NMT2	0.177539	0.010665
ENSG00000113504	SLC12A7	0.177115	0.0128673
ENSG00000154864	PIEZO2	0.176948	0.01678
ENSG00000136560	TANK	0.176575	0.0483889
ENSG00000130309	COLGALT1	0.176269	0.000472328
ENSG00000099260	PALMD	0.175349	0.0103449
ENSG00000128159	TUBGCP6	0.173947	0.0360777
ENSG00000099797	TECR	0.173764	0.0488715
ENSG00000105856	HBP1	0.173299	0.0210577
ENSG00000180104	EXOC3	0.173207	0.0428539
ENSG00000027697	IFNGR1	0.173129	0.0412259
ENSG00000177303	CASKIN2	0.173092	0.0295265
ENSG00000142156	COL6A1	0.172644	0.012994
ENSG00000167535	CACNB3	0.17236	0.0373021
ENSG00000187800	PEAR1	0.172232	0.00874258
ENSG00000137216	TMEM63B	0.172173	0.0101691
ENSG00000223501	VPS52	0.172153	0.0425668
ENSG00000161011	SQSTM1	0.171931	0.00127527
ENSG00000140945	CDH13	0.171922	0.00540359
ENSG00000130413	STK33	0.171414	0.047919
ENSG00000130640	TUBGCP2	0.171261	0.0303011
ENSG00000105341	ATP5SL	0.171152	0.0474218
ENSG00000100345	MYH9	0.171008	0.00045245
ENSG00000050165	DKK3	0.170953	0.0156048
ENSG00000077454	LRCH4	0.170652	0.0271858
ENSG00000023902	PLEKHO1	0.170275	0.0207792
ENSG00000160058	BSDC1	0.169609	0.0150197
ENSG00000242802	AP5Z1	0.169341	0.024481
ENSG00000176720	BOK	0.169254	0.0173806
ENSG00000102226	USP11	0.169252	0.0431402
ENSG00000162458	FBLIM1	0.168912	0.00557382
ENSG00000175662	TOM1L2	0.168874	0.0414175
ENSG00000104805	NUCB1	0.168871	0.00957655
ENSG00000132589	FLOT2	0.168797	0.01176
ENSG00000105538	RASIP1	0.168401	0.0158986
ENSG00000094631	HDAC6	0.168268	0.0467098
ENSG00000129925	TMEM8A	0.167859	0.0109859
ENSG00000135074	ADAM19	0.167637	0.0439862
ENSG00000175221	MED16	0.167332	0.0340254
ENSG00000173898	SPTBN2	0.167236	0.0431136
ENSG00000026025	VIM	0.166873	0.000326081
ENSG00000144583	MARCH4	0.165953	0.049094
ENSG00000155363	MOV10	0.165528	0.0185913
ENSG00000125826	RBCK1	0.165406	0.0364068
ENSG00000007384	RHBDF1	0.164821	0.0271815
ENSG00000067066	SP100	0.164376	0.0174474
ENSG00000140682	TGFB1I1	0.164247	0.0444964
ENSG00000100300	TSPO	0.164074	0.0270925
ENSG00000167671	UBXN6	0.164009	0.0438665
ENSG00000178761	FAM219B	0.163943	0.0489671
ENSG00000198053	SIRPA	0.163044	0.00899876
ENSG00000101940	WDR13	0.162698	0.0455563
ENSG00000147130	ZMYM3	0.16262	0.0405344
ENSG00000111077	TNS2	0.162044	0.0174442
ENSG00000182087	TMEM259	0.162001	0.029255
ENSG00000127054	CPSF3L	0.161821	0.0417291
ENSG00000175274	TP53I11	0.161804	0.00763272
ENSG00000158195	WASF2	0.161124	0.00402714
ENSG00000124067	SLC12A4	0.160867	0.018343
ENSG00000213923	CSNK1E	0.160854	0.0152488
ENSG00000146834	MEPCE	0.160329	0.0444968
ENSG00000186716	BCR	0.159664	0.0122372
ENSG00000167680	SEMA6B	0.159649	0.00773576
ENSG00000138772	ANXA3	0.159571	0.0359698
ENSG00000196535	MYO18A	0.1591	0.0419762
ENSG00000152518	ZFP36L2	0.158935	0.0293958
ENSG00000161904	LEMD2	0.15887	0.0497056
ENSG00000163346	PBXIP1	0.158786	0.0218202
ENSG00000198837	DENND4B	0.158668	0.0414382
ENSG00000107554	DNMBP	0.158578	0.0291662
ENSG00000111859	NEDD9	0.158426	0.0213025
ENSG00000148180	GSN	0.158323	0.00912885
ENSG00000103249	CLCN7	0.158104	0.0153829
ENSG00000137207	YIPF3	0.157808	0.0163937
ENSG00000139318	DUSP6	0.157018	0.0335588
ENSG00000132718	SYT11	0.156953	0.0223652
ENSG00000168487	BMP1	0.156429	0.044598
ENSG00000174282	ZBTB4	0.156118	0.0433559
ENSG00000176435	CLEC14A	0.155951	0.00699985
ENSG00000174059	CD34	0.155725	0.00565222
ENSG00000143878	RHOB	0.155669	0.00530519
ENSG00000130702	LAMA5	0.155187	0.0300089
ENSG00000104964	AES	0.154853	0.0109471
ENSG00000158555	GDPD5	0.154645	0.0419027
ENSG00000155366	RHOC	0.154221	0.017645
ENSG00000139998	RAB15	0.153701	0.0148142
ENSG00000145901	TNIP1	0.153284	0.0155385
ENSG00000117362	APH1A	0.153171	0.0152992
ENSG00000149564	ESAM	0.153153	0.0045435
ENSG00000165716	FAM69B	0.153152	0.0145944
ENSG00000149823	VPS51	0.153062	0.0344899
ENSG00000109736	MFSD10	0.15302	0.0459031
ENSG00000158109	TPRG1L	0.15266	0.0241629
ENSG00000008710	PKD1	0.152522	0.0333686
ENSG00000117984	CTSD	0.152305	0.0246284
ENSG00000145911	N4BP3	0.152107	0.0236963
ENSG00000136295	TTYH3	0.151149	0.00717575
ENSG00000166073	GPR176	0.151108	0.0417527
ENSG00000141522	ARHGDIA	0.151037	0.0277339
ENSG00000204592	HLA-E	0.150621	0.00620656
ENSG00000100441	KHNYN	0.1503	0.0381089
ENSG00000158769	F11R	0.149793	0.0412353
ENSG00000126878	AIF1L	0.148412	0.0155072
ENSG00000172725	CORO1B	0.148343	0.0182871
ENSG00000188559	RALGAPA2	0.148129	0.0257747
ENSG00000099875	MKNK2	0.148038	0.0352163
ENSG00000122359	ANXA11	0.14714	0.0236017
ENSG00000213445	SIPA1	0.146995	0.0430766
ENSG00000182473	EXOC7	0.146625	0.0144591
ENSG00000206503	HLA-A	0.14645	0.0154588
ENSG00000167526	RPL13	0.145795	0.037071
ENSG00000103404	USP31	0.145565	0.0255581
ENSG00000136279	DBNL	0.145108	0.0481773
ENSG00000085276	MECOM	0.144453	0.0391424
ENSG00000174903	RAB1B	0.144169	0.0378465
ENSG00000039523	FAM65A	0.14392	0.0118138
ENSG00000172037	LAMB2	0.143559	0.00907468
ENSG00000003436	TFPI	0.143485	0.0158288
ENSG00000142910	TINAGL1	0.142945	0.0239008
ENSG00000066322	ELOVL1	0.142195	0.0296045
ENSG00000030582	GRN	0.141295	0.0141272
ENSG00000089351	GRAMD1A	0.141291	0.0360091
ENSG00000139722	VPS37B	0.141268	0.047683
ENSG00000117519	CNN3	0.140753	0.00599993
ENSG00000020577	SAMD4A	0.140691	0.0324911
ENSG00000110047	EHD1	0.140663	0.0382081
ENSG00000132669	RIN2	0.140304	0.0346222
ENSG00000162434	JAK1	0.140212	0.00925229
ENSG00000173039	RELA	0.140138	0.0387588
ENSG00000050820	BCAR1	0.140026	0.0194952
ENSG00000176658	MYO1D	0.139822	0.0139072
ENSG00000213676	ATF6B	0.139801	0.0431387
ENSG00000108622	ICAM2	0.137632	0.0195185
ENSG00000032444	PNPLA6	0.137134	0.0365196
ENSG00000184584	TMEM173	0.137083	0.0351324
ENSG00000099341	PSMD8	0.136756	0.0431095
ENSG00000183741	CBX6	0.136698	0.0487831
ENSG00000100201	DDX17	0.13628	0.0321134
ENSG00000066056	TIE1	0.136122	0.00501198
ENSG00000153071	DAB2	0.135521	0.0100698
ENSG00000135506	OS9	0.1355	0.0161965
ENSG00000105974	CAV1	0.135133	0.00771263
ENSG00000175390	EIF3F	0.13483	0.0264228
ENSG00000014216	CAPN1	0.134395	0.0360693
ENSG00000196730	DAPK1	0.134298	0.0457861
ENSG00000075426	FOSL2	0.13428	0.0195298
ENSG00000064601	CTSA	0.134205	0.0411601
ENSG00000108828	VAT1	0.133308	0.0165407
ENSG00000118523	CTGF	0.132933	0.0100309
ENSG00000166888	STAT6	0.132322	0.0266157
ENSG00000188157	AGRN	0.131792	0.0337615
ENSG00000100280	AP1B1	0.131588	0.0374455
ENSG00000078808	SDF4	0.131583	0.0398908
ENSG00000140105	WARS	0.131492	0.0133891
ENSG00000203879	GDI1	0.131375	0.0473669
ENSG00000100034	PPM1F	0.130748	0.0111258
ENSG00000125089	SH3TC1	0.130563	0.0301874
ENSG00000107819	SFXN3	0.12937	0.0402742
ENSG00000138835	RGS3	0.129313	0.0162544
ENSG00000113719	ERGIC1	0.128569	0.0350378
ENSG00000100399	CHADL	0.128459	0.0187632
ENSG00000073849	ST6GAL1	0.127863	0.0410895
ENSG00000054793	ATP9A	0.127662	0.0446794
ENSG00000125844	RRBP1	0.127204	0.0274341
ENSG00000158710	TAGLN2	0.127154	0.02947
ENSG00000002834	LASP1	0.127147	0.0189969
ENSG00000140941	MAP1LC3B	0.1268	0.0381122
ENSG00000197879	MYO1C	0.125961	0.0213247
ENSG00000071242	RPS6KA2	0.125027	0.0344897
ENSG00000100243	CYB5R3	0.124212	0.0435695
ENSG00000188643	S100A16	0.123606	0.0299014
ENSG00000080845	DLGAP4	0.122938	0.0314869
ENSG00000170989	S1PR1	0.122112	0.0383728
ENSG00000138650	PCDH10	0.121234	0.029097
ENSG00000024422	EHD2	0.119641	0.0361296
ENSG00000125810	CD93	0.1193	0.0365388
ENSG00000113140	SPARC	0.117311	0.017595
ENSG00000166710	B2M	0.117145	0.0234215
ENSG00000092841	MYL6	0.116736	0.0391496
ENSG00000122378	FAM213A	0.115312	0.0299477
ENSG00000157554	ERG	0.115074	0.0361651
ENSG00000130635	COL5A1	0.113901	0.0449033
ENSG00000085733	CTTN	0.113543	0.0318003
ENSG00000142798	HSPG2	0.113174	0.0105914
ENSG00000061273	HDAC7	0.111278	0.044305
ENSG00000089159	PXN	0.107742	0.0459551
ENSG00000123453	SARDH	0.10451	0.0425475
ENSG00000071246	VASH1	0.103894	0.0458312
ENSG00000160285	LSS	0.102962	0.0389234
ENSG00000178209	PLEC	0.101767	0.0375816
ENSG00000110092	CCND1	0.0949909	0.0467234
ENSG00000147889	CDKN2A	0.0884311	0.0357771
ENSG00000267682	CTD-3220F14.2	0.0697912	0.0397768
ENSG00000261139	CTD-2517M14.5	0.0681453	0.0424122

## Sheet: Supplemental Table 1b.
Supplemental Table 1b. Decreased gene expressions under indoxyl sulfate stimulation when compared to control.
Ensembl ID	Gene name	Log2 FoldChange	P-value
ENSG00000117724	CENPF	-0.586145	1.11385e-14
ENSG00000143476	DTL	-0.553509	8.61869e-08
ENSG00000163808	KIF15	-0.509899	1.19543e-06
ENSG00000138778	CENPE	-0.490028	1.91224e-08
ENSG00000137812	CASC5	-0.482515	8.19817e-08
ENSG00000184661	CDCA2	-0.482465	2.31448e-06
ENSG00000066279	ASPM	-0.473424	7.7414e-10
ENSG00000156802	ATAD2	-0.470146	9.31393e-09
ENSG00000196549	MME	-0.465043	9.57207e-08
ENSG00000132646	PCNA	-0.460902	3.80907e-09
ENSG00000109805	NCAPG	-0.459366	2.70478e-08
ENSG00000148773	MKI67	-0.457355	9.84568e-11
ENSG00000170312	CDK1	-0.45572	2.68071e-07
ENSG00000140525	FANCI	-0.453135	2.70091e-08
ENSG00000189057	FAM111B	-0.451528	2.34304e-05
ENSG00000094804	CDC6	-0.448131	2.76231e-06
ENSG00000131747	TOP2A	-0.446869	3.21968e-09
ENSG00000198826	ARHGAP11A	-0.445871	7.07722e-07
ENSG00000156970	BUB1B	-0.444279	6.18096e-07
ENSG00000196584	XRCC2	-0.440856	7.19059e-05
ENSG00000142731	PLK4	-0.43956	1.2171e-05
ENSG00000169679	BUB1	-0.428295	1.68824e-07
ENSG00000102384	CENPI	-0.427621	2.91019e-05
ENSG00000118193	KIF14	-0.427435	1.19834e-05
ENSG00000139618	BRCA2	-0.426548	1.84197e-05
ENSG00000167670	CHAF1A	-0.425947	2.29369e-05
ENSG00000067798	NAV3	-0.415008	4.81982e-09
ENSG00000164109	MAD2L1	-0.405291	0.000104753
ENSG00000176225	RTTN	-0.404386	0.000209344
ENSG00000076003	MCM6	-0.403281	2.32221e-06
ENSG00000121152	NCAPH	-0.399802	6.71099e-05
ENSG00000176208	ATAD5	-0.398363	0.000325804
ENSG00000073111	MCM2	-0.397895	1.85763e-07
ENSG00000138182	KIF20B	-0.397729	7.2656e-05
ENSG00000184445	KNTC1	-0.394501	4.23902e-05
ENSG00000126787	DLGAP5	-0.389007	1.28178e-05
ENSG00000011426	ANLN	-0.388485	3.82253e-07
ENSG00000112159	MDN1	-0.386807	1.61183e-06
ENSG00000116830	TTF2	-0.385177	2.84666e-05
ENSG00000151725	CENPU	-0.384403	0.000169505
ENSG00000134690	CDCA8	-0.383793	3.68114e-05
ENSG00000013573	DDX11	-0.383654	0.000445436
ENSG00000114346	ECT2	-0.382697	1.23865e-05
ENSG00000137804	NUSAP1	-0.380379	5.28309e-06
ENSG00000171848	RRM2	-0.379316	4.84651e-08
ENSG00000161800	RACGAP1	-0.379141	1.10879e-05
ENSG00000092853	CLSPN	-0.378481	0.000155276
ENSG00000164104	HMGB2	-0.378335	7.92107e-07
ENSG00000113368	LMNB1	-0.37716	3.3352e-07
ENSG00000146918	NCAPG2	-0.376043	1.32095e-05
ENSG00000112984	KIF20A	-0.374071	6.80278e-07
ENSG00000165244	ZNF367	-0.369702	0.000818023
ENSG00000168496	FEN1	-0.367951	9.0594e-05
ENSG00000092621	PHGDH	-0.367577	7.05646e-06
ENSG00000121621	KIF18A	-0.367466	0.000818174
ENSG00000089685	BIRC5	-0.367039	3.29311e-06
ENSG00000123473	STIL	-0.366883	3.77163e-05
ENSG00000237649	KIFC1	-0.366822	1.05255e-05
ENSG00000154839	SKA1	-0.366063	0.000529141
ENSG00000151503	NCAPD3	-0.365576	4.61179e-05
ENSG00000012048	BRCA1	-0.365022	0.000287164
ENSG00000144381	HSPD1	-0.364506	7.15877e-09
ENSG00000145386	CCNA2	-0.363153	2.23191e-05
ENSG00000072274	TFRC	-0.36271	1.15233e-06
ENSG00000253729	PRKDC	-0.362672	3.76324e-10
ENSG00000112742	TTK	-0.360052	0.000167674
ENSG00000137807	KIF23	-0.35882	8.34145e-05
ENSG00000146670	CDCA5	-0.358728	0.000185679
ENSG00000090889	KIF4A	-0.358071	6.43066e-05
ENSG00000024526	DEPDC1	-0.356227	0.000534333
ENSG00000104738	MCM4	-0.354539	1.50581e-06
ENSG00000139734	DIAPH3	-0.353839	0.000122757
ENSG00000122966	CIT	-0.353365	0.000119056
ENSG00000119969	HELLS	-0.351271	0.000648445
ENSG00000102755	FLT1	-0.351159	6.8755e-08
ENSG00000146263	MMS22L	-0.350123	0.000567449
ENSG00000058804	NDC1	-0.348238	0.000251402
ENSG00000136108	CKAP2	-0.347815	1.11503e-05
ENSG00000138160	KIF11	-0.34746	9.00431e-05
ENSG00000149503	INCENP	-0.345893	3.04929e-05
ENSG00000111341	MGP	-0.345762	0.000501981
ENSG00000080986	NDC80	-0.341556	0.000611066
ENSG00000111602	TIMELESS	-0.340987	0.000124602
ENSG00000120802	TMPO	-0.340427	1.84409e-06
ENSG00000151849	CENPJ	-0.340356	0.0016488
ENSG00000138180	CEP55	-0.339075	2.18335e-05
ENSG00000175063	UBE2C	-0.338839	0.000372729
ENSG00000167513	CDT1	-0.338685	0.000936707
ENSG00000144554	FANCD2	-0.338556	0.000553535
ENSG00000085999	RAD54L	-0.338408	0.00226518
ENSG00000166881	NEMP1	-0.338312	0.00015971
ENSG00000105967	TFEC	-0.337234	0.00177616
ENSG00000176890	TYMS	-0.335207	4.52549e-06
ENSG00000228716	DHFR	-0.335189	0.00150726
ENSG00000166845	C18orf54	-0.330214	0.0014269
ENSG00000106853	PTGR1	-0.330101	2.71904e-05
ENSG00000088325	TPX2	-0.329567	3.79575e-06
ENSG00000162063	CCNF	-0.32868	0.000115124
ENSG00000198901	PRC1	-0.328117	3.36346e-06
ENSG00000124795	DEK	-0.327044	3.0521e-05
ENSG00000169213	RAB3B	-0.326732	0.000586798
ENSG00000113810	SMC4	-0.326163	1.27643e-05
ENSG00000075218	GTSE1	-0.324853	0.000215556
ENSG00000154734	ADAMTS1	-0.319539	0.000547784
ENSG00000101412	E2F1	-0.319264	0.00207387
ENSG00000070950	RAD18	-0.318762	0.00305944
ENSG00000068489	PRR11	-0.317851	2.3481e-05
ENSG00000135476	ESPL1	-0.315815	0.00168818
ENSG00000162607	USP1	-0.315274	0.000211875
ENSG00000101868	POLA1	-0.314562	0.00219885
ENSG00000117650	NEK2	-0.312912	0.00454314
ENSG00000171241	SHCBP1	-0.312855	0.000566186
ENSG00000178295	GEN1	-0.312452	0.00245014
ENSG00000140534	TICRR	-0.31137	0.00248501
ENSG00000026508	CD44	-0.311004	0.00451721
ENSG00000167325	RRM1	-0.310928	1.12692e-05
ENSG00000129484	PARP2	-0.309001	0.00382164
ENSG00000094916	CBX5	-0.308494	1.22192e-05
ENSG00000187741	FANCA	-0.307407	0.00174927
ENSG00000165490	DDIAS	-0.306559	0.00572259
ENSG00000130816	DNMT1	-0.306485	6.24321e-06
ENSG00000163507	KIAA1524	-0.30603	0.00238761
ENSG00000136492	BRIP1	-0.306028	0.00516923
ENSG00000198554	WDHD1	-0.305918	0.00424265
ENSG00000137310	TCF19	-0.305214	0.00158689
ENSG00000147874	HAUS6	-0.304124	0.00257192
ENSG00000132436	FIGNL1	-0.303696	0.00212652
ENSG00000162407	PPAP2B	-0.303554	0.00204329
ENSG00000163535	SGOL2	-0.301611	0.0027655
ENSG00000051341	POLQ	-0.300884	0.00636577
ENSG00000133863	TEX15	-0.300666	0.00257921
ENSG00000065328	MCM10	-0.300386	0.00537321
ENSG00000128944	KNSTRN	-0.298391	0.00300432
ENSG00000168078	PBK	-0.298168	0.0038182
ENSG00000122641	INHBA	-0.297407	0.00455181
ENSG00000072571	HMMR	-0.295677	0.00199309
ENSG00000174371	EXO1	-0.294746	0.0078999
ENSG00000197299	BLM	-0.293983	0.00598021
ENSG00000175643	RMI2	-0.293728	0.00814112
ENSG00000069275	NUCKS1	-0.293593	7.03983e-08
ENSG00000171365	CLCN5	-0.292915	0.00324391
ENSG00000155561	NUP205	-0.292756	3.85951e-05
ENSG00000007968	E2F2	-0.291573	0.0075562
ENSG00000129195	FAM64A	-0.290782	0.00567623
ENSG00000034063	UHRF1	-0.290213	0.00310444
ENSG00000162490	DRAXIN	-0.289722	0.00775893
ENSG00000076382	SPAG5	-0.289016	0.000924793
ENSG00000065911	MTHFD2	-0.288581	0.000380717
ENSG00000131153	GINS2	-0.288193	0.00775107
ENSG00000166508	MCM7	-0.287062	5.93301e-06
ENSG00000186185	KIF18B	-0.286865	0.00498084
ENSG00000071539	TRIP13	-0.286623	0.00213872
ENSG00000134222	PSRC1	-0.28656	0.00975143
ENSG00000157456	CCNB2	-0.286303	0.00150865
ENSG00000105011	ASF1B	-0.285468	0.00468804
ENSG00000135069	PSAT1	-0.284115	0.00211607
ENSG00000125885	MCM8	-0.282185	0.00952757
ENSG00000077157	PPP1R12B	-0.281767	0.0103944
ENSG00000092470	WDR76	-0.281596	0.00686968
ENSG00000115687	PASK	-0.281516	0.00909189
ENSG00000166803	KIAA0101	-0.281094	0.00757031
ENSG00000172159	FRMD3	-0.280994	0.00789446
ENSG00000149636	DSN1	-0.28051	0.00873974
ENSG00000147536	GINS4	-0.28006	0.00768697
ENSG00000100297	MCM5	-0.280035	4.67031e-05
ENSG00000122952	ZWINT	-0.27999	0.00233151
ENSG00000168411	RFWD3	-0.279959	0.000734825
ENSG00000112118	MCM3	-0.278273	0.000184308
ENSG00000079616	KIF22	-0.276999	0.00151372
ENSG00000093009	CDC45	-0.276983	0.00780895
ENSG00000171208	NETO2	-0.27622	0.00700896
ENSG00000180198	RCC1	-0.275952	0.0008517
ENSG00000117593	DARS2	-0.275066	0.00180628
ENSG00000181544	FANCB	-0.274944	0.00791993
ENSG00000077152	UBE2T	-0.274885	0.0127775
ENSG00000146143	PRIM2	-0.274761	0.0121632
ENSG00000051180	RAD51	-0.274759	0.0108284
ENSG00000120539	MASTL	-0.274384	0.00514138
ENSG00000213694	S1PR3	-0.273898	0.00827462
ENSG00000112312	GMNN	-0.273197	0.010772
ENSG00000124207	CSE1L	-0.272914	1.22273e-05
ENSG00000040275	SPDL1	-0.272861	0.00905559
ENSG00000186871	ERCC6L	-0.272638	0.0140693
ENSG00000092140	G2E3	-0.272415	0.00579791
ENSG00000181938	GINS3	-0.270758	0.00968912
ENSG00000135919	SERPINE2	-0.270712	0.00333632
ENSG00000148019	CEP78	-0.270617	0.00270012
ENSG00000113569	NUP155	-0.270151	0.00186306
ENSG00000152455	SUV39H2	-0.268623	0.0118641
ENSG00000160299	PCNT	-0.268599	0.00130725
ENSG00000117399	CDC20	-0.268239	0.000267251
ENSG00000128050	PAICS	-0.267748	4.42358e-05
ENSG00000259207	ITGB3	-0.267257	0.0113937
ENSG00000149554	CHEK1	-0.267175	0.00641405
ENSG00000062822	POLD1	-0.267151	0.00397405
ENSG00000049323	LTBP1	-0.266864	0.000730672
ENSG00000112029	FBXO5	-0.266734	0.0153072
ENSG00000221829	FANCG	-0.266419	0.00797674
ENSG00000072501	SMC1A	-0.266129	0.000117801
ENSG00000163781	TOPBP1	-0.263212	0.000870273
ENSG00000159640	ACE	-0.263058	0.000523059
ENSG00000142945	KIF2C	-0.262978	0.00716145
ENSG00000111206	FOXM1	-0.261647	4.36827e-05
ENSG00000171617	ENC1	-0.261574	0.00505542
ENSG00000178999	AURKB	-0.261556	0.00917458
ENSG00000159259	CHAF1B	-0.26109	0.0155203
ENSG00000101447	FAM83D	-0.260509	0.00548561
ENSG00000175216	CKAP5	-0.259795	0.000203071
ENSG00000123975	CKS2	-0.258533	0.0122419
ENSG00000162769	FLVCR1	-0.257958	0.0163017
ENSG00000013810	TACC3	-0.257764	0.00105435
ENSG00000183856	IQGAP3	-0.256955	0.00223445
ENSG00000129173	E2F8	-0.256733	0.0180142
ENSG00000165304	MELK	-0.256724	0.00467351
ENSG00000120334	CENPL	-0.256312	0.0208068
ENSG00000185347	C14orf80	-0.255314	0.0212668
ENSG00000146433	TMEM181	-0.254566	0.000644141
ENSG00000129810	SGOL1	-0.254049	0.0221496
ENSG00000160298	C21orf58	-0.253916	0.0204691
ENSG00000135480	KRT7	-0.253129	0.02106
ENSG00000101003	GINS1	-0.252914	0.0172766
ENSG00000172292	CERS6	-0.252658	0.00976312
ENSG00000105968	H2AFV	-0.252518	0.000645753
ENSG00000100578	KIAA0586	-0.252262	0.00823534
ENSG00000185432	METTL7A	-0.250892	0.0198057
ENSG00000184162	NR2C2AP	-0.250525	0.0218802
ENSG00000065150	IPO5	-0.250371	1.99035e-05
ENSG00000115163	CENPA	-0.250297	0.0242402
ENSG00000143603	KCNN3	-0.250096	0.019401
ENSG00000170540	ARL6IP1	-0.249812	7.2928e-05
ENSG00000143401	ANP32E	-0.249765	0.00376123
ENSG00000077514	POLD3	-0.249641	0.0200762
ENSG00000164171	ITGA2	-0.248667	8.47589e-05
ENSG00000196305	IARS	-0.247709	0.000139655
ENSG00000175305	CCNE2	-0.247691	0.0251118
ENSG00000204899	MZT1	-0.247617	0.023044
ENSG00000123416	TUBA1B	-0.247457	8.31621e-07
ENSG00000148688	RPP30	-0.24713	0.0173592
ENSG00000120837	NFYB	-0.246882	0.0186615
ENSG00000133687	TMTC1	-0.246386	0.0217178
ENSG00000123505	AMD1	-0.246266	0.00305485
ENSG00000085840	ORC1	-0.246192	0.0260073
ENSG00000058056	USP13	-0.246048	0.00759137
ENSG00000211772	TRBC2	-0.245533	0.0168065
ENSG00000152818	UTRN	-0.245122	5.10723e-05
ENSG00000153936	HS2ST1	-0.24484	0.00755799
ENSG00000006634	DBF4	-0.244646	0.023973
ENSG00000184226	PCDH9	-0.24401	0.0277926
ENSG00000260604	RP1-140K8.5	-0.243946	0.0270741
ENSG00000054654	SYNE2	-0.243715	0.000897712
ENSG00000138092	CENPO	-0.242401	0.00625073
ENSG00000145331	TRMT10A	-0.242303	0.0280851
ENSG00000168476	REEP4	-0.241648	0.00848808
ENSG00000139496	NUPL1	-0.240715	0.00295999
ENSG00000114107	CEP70	-0.240692	0.030257
ENSG00000101773	RBBP8	-0.240663	0.0291194
ENSG00000095485	CWF19L1	-0.240436	0.0158941
ENSG00000169684	CHRNA5	-0.240187	0.0306152
ENSG00000080839	RBL1	-0.240085	0.0196217
ENSG00000166851	PLK1	-0.240077	0.000860106
ENSG00000172071	EIF2AK3	-0.239021	0.00381826
ENSG00000145147	SLIT2	-0.238618	0.0183986
ENSG00000099810	MTAP	-0.238493	0.0166714
ENSG00000135679	MDM2	-0.238474	0.000240289
ENSG00000134057	CCNB1	-0.238439	0.00251429
ENSG00000101057	MYBL2	-0.237872	0.00122885
ENSG00000050393	MCUR1	-0.237535	0.00851827
ENSG00000178966	RMI1	-0.237025	0.0317734
ENSG00000203668	CHML	-0.236529	0.0156922
ENSG00000138678	AGPAT9	-0.236396	0.0177215
ENSG00000100526	CDKN3	-0.235955	0.028604
ENSG00000120694	HSPH1	-0.234715	0.000809668
ENSG00000035928	RFC1	-0.234459	0.00181387
ENSG00000123219	CENPK	-0.233777	0.0323493
ENSG00000091428	RAPGEF4	-0.2337	0.0352815
ENSG00000109814	UGDH	-0.233019	0.00417599
ENSG00000174442	ZWILCH	-0.232184	0.0126305
ENSG00000111581	NUP107	-0.231931	0.014238
ENSG00000132142	ACACA	-0.231397	0.000153328
ENSG00000138685	FGF2	-0.23134	0.0372396
ENSG00000198056	PRIM1	-0.231338	0.0360366
ENSG00000006625	GGCT	-0.231231	0.0268743
ENSG00000152377	SPOCK1	-0.230888	0.000860071
ENSG00000156110	ADK	-0.230448	0.0262865
ENSG00000111711	GOLT1B	-0.229919	0.0167025
ENSG00000137727	ARHGAP20	-0.229092	0.0213504
ENSG00000129534	MIS18BP1	-0.228781	0.0105665
ENSG00000145375	SPATA5	-0.228698	0.0351952
ENSG00000010292	NCAPD2	-0.228547	0.000390852
ENSG00000138658	ZGRF1	-0.228382	0.0397719
ENSG00000089006	SNX5	-0.228335	0.00381266
ENSG00000134049	IER3IP1	-0.227861	0.0276379
ENSG00000100629	CEP128	-0.227772	0.0392518
ENSG00000111445	RFC5	-0.227536	0.0351733
ENSG00000165891	E2F7	-0.227306	0.00981739
ENSG00000127603	MACF1	-0.227021	0.000109826
ENSG00000114480	GBE1	-0.226409	0.000250595
ENSG00000101624	CEP76	-0.226072	0.0415457
ENSG00000139629	GALNT6	-0.225248	0.0103009
ENSG00000115602	IL1RL1	-0.225215	0.0365646
ENSG00000166411	IDH3A	-0.224531	0.0146213
ENSG00000168566	SNRNP48	-0.22401	0.0324356
ENSG00000171320	ESCO2	-0.223913	0.0424667
ENSG00000125944	HNRNPR	-0.223817	0.000464808
ENSG00000116127	ALMS1	-0.223411	0.0195407
ENSG00000146376	ARHGAP18	-0.22333	0.000748222
ENSG00000135446	CDK4	-0.223116	0.00117667
ENSG00000124383	MPHOSPH10	-0.222893	0.0290342
ENSG00000175455	CCDC14	-0.22289	0.0233668
ENSG00000123080	CDKN2C	-0.222781	0.0377728
ENSG00000136824	SMC2	-0.22277	0.0114651
ENSG00000231365	RP11-418J17.1	-0.222673	0.0395541
ENSG00000152270	PDE3B	-0.222618	0.0282026
ENSG00000113013	HSPA9	-0.222234	0.000395199
ENSG00000110917	MLEC	-0.222164	0.000176606
ENSG00000254726	MEX3A	-0.222161	0.00911403
ENSG00000135837	CEP350	-0.22199	0.00912181
ENSG00000139354	GAS2L3	-0.221665	0.00679221
ENSG00000091651	ORC6	-0.221624	0.0452671
ENSG00000186767	SPIN4	-0.221115	0.0459347
ENSG00000116062	MSH6	-0.220738	0.00651335
ENSG00000130052	STARD8	-0.220729	0.00626785
ENSG00000165501	LRR1	-0.220497	0.0455672
ENSG00000084774	CAD	-0.220337	0.00101655
ENSG00000030066	NUP160	-0.22009	0.00903591
ENSG00000109674	NEIL3	-0.219233	0.0386674
ENSG00000064989	CALCRL	-0.218998	0.000313197
ENSG00000138185	ENTPD1	-0.21879	0.0343023
ENSG00000163510	CWC22	-0.218662	0.0300694
ENSG00000095574	IKZF5	-0.218551	0.0327074
ENSG00000164032	H2AFZ	-0.218515	0.000923902
ENSG00000203791	METTL10	-0.218331	0.0310609
ENSG00000153207	AHCTF1	-0.21695	0.0186226
ENSG00000082898	XPO1	-0.216367	0.0013281
ENSG00000111665	CDCA3	-0.216184	0.0414269
ENSG00000080824	HSP90AA1	-0.216119	2.02912e-05
ENSG00000049130	KITLG	-0.216032	0.00575112
ENSG00000205339	IPO7	-0.215779	0.000402111
ENSG00000163935	SFMBT1	-0.215615	0.0426718
ENSG00000070669	ASNS	-0.215132	0.0388618
ENSG00000111647	UHRF1BP1L	-0.214894	0.0274589
ENSG00000080345	RIF1	-0.214781	0.00460788
ENSG00000095002	MSH2	-0.21466	0.0181052
ENSG00000108055	SMC3	-0.214412	0.00636963
ENSG00000196591	HDAC2	-0.214377	0.00137773
ENSG00000160957	RECQL4	-0.21392	0.0336443
ENSG00000272221	XXbac-BPG181B23.7	-0.213326	0.0176134
ENSG00000108106	UBE2S	-0.213283	0.0344146
ENSG00000137726	FXYD6	-0.213196	0.0198398
ENSG00000165732	DDX21	-0.212638	0.0013682
ENSG00000168393	DTYMK	-0.212629	0.0296229
ENSG00000189308	LIN54	-0.212143	0.0426196
ENSG00000197312	DDI2	-0.212035	0.0131057
ENSG00000165480	SKA3	-0.211514	0.0482377
ENSG00000109685	WHSC1	-0.211447	0.000360057
ENSG00000156504	FAM122B	-0.210777	0.0180305
ENSG00000109084	TMEM97	-0.21065	0.00189931
ENSG00000130821	SLC6A8	-0.210607	0.0164704
ENSG00000143799	PARP1	-0.210065	0.000695832
ENSG00000155304	HSPA13	-0.209675	0.0193316
ENSG00000204370	SDHD	-0.209264	0.0373592
ENSG00000138246	DNAJC13	-0.209184	0.00138572
ENSG00000177565	TBL1XR1	-0.209009	0.00487188
ENSG00000173456	RNF26	-0.20894	0.0132593
ENSG00000038210	PI4K2B	-0.208743	0.026995
ENSG00000029153	ARNTL2	-0.207541	0.0192607
ENSG00000197860	SGTB	-0.20741	0.0330286
ENSG00000148840	PPRC1	-0.207266	0.00988101
ENSG00000135002	RFK	-0.207264	0.0172422
ENSG00000170776	AKAP13	-0.207056	0.00137072
ENSG00000164754	RAD21	-0.206621	0.00191969
ENSG00000141668	CBLN2	-0.206248	0.0298274
ENSG00000169607	CKAP2L	-0.206007	0.0398489
ENSG00000181163	NPM1	-0.205073	4.13645e-05
ENSG00000144231	POLR2D	-0.205003	0.0411449
ENSG00000120800	UTP20	-0.204995	0.0194573
ENSG00000143815	LBR	-0.204988	0.00137337
ENSG00000144674	GOLGA4	-0.204635	0.00365465
ENSG00000167900	TK1	-0.204537	0.0106677
ENSG00000118515	SGK1	-0.204453	0.0254533
ENSG00000176619	LMNB2	-0.204257	0.0010284
ENSG00000198168	SVIP	-0.204012	0.0336244
ENSG00000153107	ANAPC1	-0.203401	0.0309294
ENSG00000147421	HMBOX1	-0.203331	0.0308497
ENSG00000120699	EXOSC8	-0.203145	0.0419145
ENSG00000136861	CDK5RAP2	-0.203085	0.0145928
ENSG00000163961	RNF168	-0.202842	0.0182596
ENSG00000180776	ZDHHC20	-0.20256	0.0319606
ENSG00000111300	NAA25	-0.202091	0.0359332
ENSG00000149485	FADS1	-0.202089	0.000396766
ENSG00000172115	CYCS	-0.202002	0.0135097
ENSG00000164035	EMCN	-0.201655	0.000697397
ENSG00000147274	RBMX	-0.201163	0.00102354
ENSG00000115355	CCDC88A	-0.200649	0.0150739
ENSG00000167747	C19orf48	-0.200397	0.0253656
ENSG00000184232	OAF	-0.200297	0.0323131
ENSG00000106462	EZH2	-0.200289	0.0379268
ENSG00000162819	BROX	-0.20022	0.0128927
ENSG00000074695	LMAN1	-0.199713	0.00149574
ENSG00000188211	NCR3LG1	-0.199265	0.0205546
ENSG00000135451	TROAP	-0.198956	0.0479594
ENSG00000112249	ASCC3	-0.198834	0.0127275
ENSG00000100714	MTHFD1	-0.198377	0.00809339
ENSG00000091409	ITGA6	-0.197892	0.00130653
ENSG00000025770	NCAPH2	-0.197087	0.0486881
ENSG00000118946	PCDH17	-0.196996	0.00750787
ENSG00000128567	PODXL	-0.196927	0.000298186
ENSG00000138829	FBN2	-0.196328	0.00164185
ENSG00000170779	CDCA4	-0.19547	0.0338369
ENSG00000167601	AXL	-0.195451	0.00474313
ENSG00000144136	SLC20A1	-0.195275	0.00265997
ENSG00000104635	SLC39A14	-0.19511	0.00808172
ENSG00000136628	EPRS	-0.194283	0.00218157
ENSG00000164176	EDIL3	-0.194244	0.031097
ENSG00000197713	RPE	-0.193779	0.0395915
ENSG00000102054	RBBP7	-0.193241	0.00306231
ENSG00000166451	CENPN	-0.193121	0.0463538
ENSG00000162733	DDR2	-0.191952	0.0091497
ENSG00000093000	NUP50	-0.191929	0.0110242
ENSG00000182628	SKA2	-0.191923	0.0389746
ENSG00000101639	CEP192	-0.191462	0.0427832
ENSG00000071073	MGAT4A	-0.19125	0.0184784
ENSG00000132780	NASP	-0.191122	0.0112083
ENSG00000152495	CAMK4	-0.190969	0.0471771
ENSG00000255103	KIAA0754	-0.190921	0.0276949
ENSG00000188486	H2AFX	-0.190015	0.0126029
ENSG00000177084	POLE	-0.189989	0.012751
ENSG00000189403	HMGB1	-0.189488	0.00249095
ENSG00000081181	ARG2	-0.188774	0.0463604
ENSG00000120457	KCNJ5	-0.188715	0.0479774
ENSG00000112245	PTP4A1	-0.188657	0.00869109
ENSG00000115750	TAF1B	-0.188495	0.0451048
ENSG00000116679	IVNS1ABP	-0.188443	0.0252501
ENSG00000106080	FKBP14	-0.188388	0.0470602
ENSG00000139697	SBNO1	-0.188223	0.0115986
ENSG00000119681	LTBP2	-0.188188	0.00028692
ENSG00000115053	NCL	-0.18748	0.000703188
ENSG00000166197	NOLC1	-0.186832	0.0188564
ENSG00000100522	GNPNAT1	-0.186517	0.0283317
ENSG00000103657	HERC1	-0.18612	0.00528104
ENSG00000163655	GMPS	-0.185253	0.0166979
ENSG00000188529	SRSF10	-0.184977	0.0171432
ENSG00000134291	TMEM106C	-0.184693	0.0226697
ENSG00000108424	KPNB1	-0.184427	0.000369244
ENSG00000136603	SKIL	-0.18428	0.0194609
ENSG00000121211	MND1	-0.184166	0.034391
ENSG00000138018	EPT1	-0.184041	0.0439212
ENSG00000165997	ARL5B	-0.183996	0.0415766
ENSG00000112339	HBS1L	-0.183427	0.024012
ENSG00000060688	SNRNP40	-0.183164	0.0433521
ENSG00000109971	HSPA8	-0.182996	6.47402e-05
ENSG00000131711	MAP1B	-0.182795	0.00131758
ENSG00000172845	SP3	-0.181866	0.0217192
ENSG00000101843	PSMD10	-0.181866	0.0309816
ENSG00000138031	ADCY3	-0.181603	0.0319676
ENSG00000101040	ZMYND8	-0.181385	0.0116542
ENSG00000090060	PAPOLA	-0.181055	0.00181579
ENSG00000134250	NOTCH2	-0.18061	0.00993902
ENSG00000146247	PHIP	-0.180487	0.0299653
ENSG00000136731	UGGT1	-0.180364	0.00505652
ENSG00000109861	CTSC	-0.180327	0.0118609
ENSG00000105281	SLC1A5	-0.180261	0.0123377
ENSG00000169083	AR	-0.179671	0.0394971
ENSG00000171490	RSL1D1	-0.178746	0.0176406
ENSG00000184575	XPOT	-0.178595	0.00938897
ENSG00000157106	SMG1	-0.177588	0.00857655
ENSG00000108588	CCDC47	-0.177384	0.0303747
ENSG00000124783	SSR1	-0.177063	0.00476465
ENSG00000158290	CUL4B	-0.177039	0.00196012
ENSG00000105825	TFPI2	-0.176409	0.0123123
ENSG00000174197	MGA	-0.176367	0.0212748
ENSG00000187229	RP11-161I2.1	-0.175847	0.0471574
ENSG00000110841	PPFIBP1	-0.175799	0.0109974
ENSG00000104331	IMPAD1	-0.175722	0.00660005
ENSG00000130204	TOMM40	-0.175105	0.0496508
ENSG00000167005	NUDT21	-0.174451	0.010632
ENSG00000092439	TRPM7	-0.174409	0.0368285
ENSG00000139324	TMTC3	-0.174277	0.0467716
ENSG00000178691	SUZ12	-0.173758	0.046716
ENSG00000106105	GARS	-0.173685	0.00410188
ENSG00000066654	THUMPD1	-0.173388	0.048426
ENSG00000157193	LRP8	-0.173062	0.0451627
ENSG00000120137	PANK3	-0.172602	0.0107467
ENSG00000163714	U2SURP	-0.172558	0.0290442
ENSG00000029993	HMGB3	-0.172544	0.0338177
ENSG00000112983	BRD8	-0.171619	0.0451321
ENSG00000198176	TFDP1	-0.171279	0.011853
ENSG00000134508	CABLES1	-0.171183	0.0371392
ENSG00000136938	ANP32B	-0.170909	0.00657379
ENSG00000120992	LYPLA1	-0.170569	0.0293847
ENSG00000091129	NRCAM	-0.170257	0.0105694
ENSG00000111371	SLC38A1	-0.170253	0.00397751
ENSG00000101596	SMCHD1	-0.169916	0.0482483
ENSG00000150687	PRSS23	-0.169878	0.00584072
ENSG00000181555	SETD2	-0.169828	0.019875
ENSG00000101972	STAG2	-0.169671	0.0156182
ENSG00000068796	KIF2A	-0.169347	0.0403613
ENSG00000197415	VEPH1	-0.169113	0.0283183
ENSG00000111145	ELK3	-0.168226	0.00445263
ENSG00000129351	ILF3	-0.1682	0.00137441
ENSG00000242265	PEG10	-0.168051	0.0328603
ENSG00000151914	DST	-0.167895	0.00427254
ENSG00000163162	RNF149	-0.167823	0.0494636
ENSG00000081154	PCNP	-0.167526	0.0284029
ENSG00000135316	SYNCRIP	-0.167014	0.00537497
ENSG00000077097	TOP2B	-0.16685	0.0119314
ENSG00000100632	ERH	-0.166309	0.0461624
ENSG00000143742	SRP9	-0.166114	0.0333962
ENSG00000113161	HMGCR	-0.165821	0.00816661
ENSG00000100591	AHSA1	-0.165269	0.0336832
ENSG00000137312	FLOT1	-0.165129	0.016563
ENSG00000187079	TEAD1	-0.164396	0.0367375
ENSG00000120438	TCP1	-0.163785	0.00497462
ENSG00000095319	NUP188	-0.163518	0.0155508
ENSG00000146676	PURB	-0.16317	0.0318202
ENSG00000170522	ELOVL6	-0.162884	0.032484
ENSG00000124198	ARFGEF2	-0.162779	0.0189546
ENSG00000139687	RB1	-0.162586	0.0453236
ENSG00000164151	ICE1	-0.1621	0.0408868
ENSG00000009954	BAZ1B	-0.162036	0.0101086
ENSG00000197451	HNRNPAB	-0.161778	0.0113483
ENSG00000116962	NID1	-0.161464	0.00673561
ENSG00000213853	EMP2	-0.161459	0.0482876
ENSG00000134109	EDEM1	-0.161376	0.0231492
ENSG00000206560	ANKRD28	-0.161235	0.0217877
ENSG00000224078	SNHG14	-0.16085	0.0362616
ENSG00000135829	DHX9	-0.160676	0.0101182
ENSG00000168807	SNTB2	-0.160445	0.0243215
ENSG00000138095	LRPPRC	-0.160349	0.0160224
ENSG00000144724	PTPRG	-0.160335	0.0467234
ENSG00000163539	CLASP2	-0.159513	0.048377
ENSG00000134954	ETS1	-0.159262	0.0141345
ENSG00000178202	KDELC2	-0.159155	0.0491003
ENSG00000138119	MYOF	-0.158176	0.00264717
ENSG00000125107	CNOT1	-0.158158	0.00848632
ENSG00000129128	SPCS3	-0.158142	0.0211939
ENSG00000119335	SET	-0.158109	0.00433561
ENSG00000067064	IDI1	-0.158047	0.0160884
ENSG00000021776	AQR	-0.157993	0.0394153
ENSG00000170144	HNRNPA3	-0.157154	0.00844771
ENSG00000131389	SLC6A6	-0.156738	0.0217774
ENSG00000162618	ADGRL4	-0.156279	0.0102424
ENSG00000182253	SYNM	-0.156227	0.0412471
ENSG00000067955	CBFB	-0.155837	0.0421721
ENSG00000170006	TMEM154	-0.155667	0.0393895
ENSG00000134333	LDHA	-0.155536	0.00700156
ENSG00000152601	MBNL1	-0.155532	0.00355466
ENSG00000102908	NFAT5	-0.155347	0.0274839
ENSG00000164163	ABCE1	-0.155248	0.0186523
ENSG00000117592	PRDX6	-0.154606	0.0100472
ENSG00000087470	DNM1L	-0.154425	0.0286819
ENSG00000167553	TUBA1C	-0.154217	0.0106101
ENSG00000133706	LARS	-0.153405	0.015581
ENSG00000196159	FAT4	-0.153006	0.0370595
ENSG00000120156	TEK	-0.152871	0.0247705
ENSG00000081189	MEF2C	-0.152298	0.0182122
ENSG00000159131	GART	-0.152018	0.0474966
ENSG00000121579	NAA50	-0.151382	0.0275401
ENSG00000115241	PPM1G	-0.15131	0.0211962
ENSG00000018510	AGPS	-0.150249	0.0396523
ENSG00000196419	XRCC6	-0.149924	0.0109111
ENSG00000186298	PPP1CC	-0.149805	0.020895
ENSG00000120437	ACAT2	-0.149308	0.0152291
ENSG00000166801	FAM111A	-0.149203	0.0479167
ENSG00000133657	ATP13A3	-0.147815	0.0433351
ENSG00000055917	PUM2	-0.147373	0.047015
ENSG00000004897	CDC27	-0.147034	0.0353506
ENSG00000168268	NT5DC2	-0.146786	0.0307018
ENSG00000200087	SNORA73B	-0.146772	0.0247112
ENSG00000105976	MET	-0.146649	0.0405387
ENSG00000171488	LRRC8C	-0.146009	0.0135092
ENSG00000141458	NPC1	-0.145643	0.0163564
ENSG00000134684	YARS	-0.145365	0.0467074
ENSG00000079246	XRCC5	-0.145286	0.00804012
ENSG00000166833	NAV2	-0.144511	0.0167692
ENSG00000177119	ANO6	-0.144105	0.0111868
ENSG00000074800	ENO1	-0.143079	0.0051329
ENSG00000153094	BCL2L11	-0.142867	0.0420805
ENSG00000076356	PLXNA2	-0.14239	0.00657736
ENSG00000143970	ASXL2	-0.142166	0.0449554
ENSG00000112697	TMEM30A	-0.141896	0.0362489
ENSG00000166446	CDYL2	-0.141582	0.0400168
ENSG00000168439	STIP1	-0.141071	0.0201789
ENSG00000044574	HSPA5	-0.140805	0.00425674
ENSG00000115758	ODC1	-0.140616	0.0383852
ENSG00000145681	HAPLN1	-0.140353	0.0418712
ENSG00000104517	UBR5	-0.140135	0.0334267
ENSG00000139514	SLC7A1	-0.139574	0.0330562
ENSG00000117632	STMN1	-0.139074	0.0146597
ENSG00000083312	TNPO1	-0.138744	0.0202818
ENSG00000117450	PRDX1	-0.138567	0.0153879
ENSG00000029363	BCLAF1	-0.138102	0.032544
ENSG00000154473	BUB3	-0.138036	0.0484649
ENSG00000119403	PHF19	-0.137838	0.0427095
ENSG00000110713	NUP98	-0.13687	0.0364122
ENSG00000054523	KIF1B	-0.136596	0.0397734
ENSG00000082781	ITGB5	-0.136585	0.0403928
ENSG00000158417	EIF5B	-0.135853	0.0422207
ENSG00000128595	CALU	-0.135713	0.0185426
ENSG00000170017	ALCAM	-0.135713	0.0371465
ENSG00000182199	SHMT2	-0.135692	0.0477082
ENSG00000122566	HNRNPA2B1	-0.135458	0.00719937
ENSG00000204217	BMPR2	-0.135349	0.0485328
ENSG00000123684	LPGAT1	-0.134746	0.0487746
ENSG00000096384	HSP90AB1	-0.134041	0.00395583
ENSG00000172716	SLFN11	-0.132401	0.0496416
ENSG00000108829	LRRC59	-0.132266	0.034474
ENSG00000008294	SPAG9	-0.132127	0.0472122
ENSG00000189091	SF3B3	-0.131919	0.0289465
ENSG00000132341	RAN	-0.131216	0.0282436
ENSG00000128989	ARPP19	-0.131125	0.0390653
ENSG00000156261	CCT8	-0.131077	0.0278126
ENSG00000102144	PGK1	-0.130613	0.0269729
ENSG00000166598	HSP90B1	-0.130533	0.0129826
ENSG00000012660	ELOVL5	-0.129755	0.0247839
ENSG00000160551	TAOK1	-0.129616	0.0368361
ENSG00000166226	CCT2	-0.129287	0.047238
ENSG00000196230	TUBB	-0.128518	0.00714671
ENSG00000143621	ILF2	-0.127897	0.0306885
ENSG00000170348	TMED10	-0.126106	0.0265529
ENSG00000115484	CCT4	-0.125274	0.0422214
ENSG00000188229	TUBB4B	-0.124903	0.0280882
ENSG00000102024	PLS3	-0.124189	0.030565
ENSG00000096433	ITPR3	-0.124064	0.0299352
ENSG00000197077	KIAA1671	-0.124037	0.043115
ENSG00000106070	GRB10	-0.12372	0.0425302
ENSG00000150753	CCT5	-0.122641	0.0314418
ENSG00000164111	ANXA5	-0.122086	0.0180185
ENSG00000127022	CANX	-0.121986	0.0215344
ENSG00000104408	EIF3E	-0.121669	0.0269591
ENSG00000143248	RGS5	-0.121466	0.0267425
ENSG00000131504	DIAPH1	-0.121422	0.0310594
ENSG00000182481	KPNA2	-0.121414	0.0286374
ENSG00000060982	BCAT1	-0.120707	0.0370834
ENSG00000132507	EIF5A	-0.119848	0.049051
ENSG00000163565	IFI16	-0.119628	0.0485201
ENSG00000142864	SERBP1	-0.117394	0.038832
ENSG00000086758	HUWE1	-0.117375	0.040706
ENSG00000111716	LDHB	-0.116394	0.036411
ENSG00000054118	THRAP3	-0.115607	0.0485591
ENSG00000164161	HHIP	-0.111167	0.0318789
ENSG00000117523	PRRC2C	-0.110425	0.0465044
ENSG00000141367	CLTC	-0.108149	0.0363259
ENSG00000173110	HSPA6	-0.10562	0.0224881
ENSG00000187109	NAP1L1	-0.103345	0.0435917
ENSG00000215301	DDX3X	-0.103041	0.0399013
ENSG00000198959	TGM2	-0.102105	0.0285599
ENSG00000197846	HIST1H2BF	-0.0940324	0.0428267
ENSG00000141198	TOM1L1	-0.0935909	0.0342616
ENSG00000273183	RP11-5C23.2	-0.0658961	0.044724
